# Supplementary material for: Fluorine-rich deep eutectic electrolytes enabling robust interphases and nonflammability of high-voltage lithium metal batteries
Source: Royal Society of Chemistry journal article supplement (doi:10.1039/d4ta04316b), 2024-01-01
Supplement: d4ta04316b1.pdf [file d4ta04316b1.pdf]

## Supporting Information

### **Fluorine-rich deep eutectic electrolytes enabling robust interphases and nonflammability of high-voltage lithium metal batteries**

Jun Yang<sup>a,c,#</sup>, Mingzi Sun<sup>b,#</sup>, Rongrong Li<sup>a,b</sup>, Lijiang Yin<sup>a,c</sup>, Bolong Huang<sup>b,\*</sup>, Xiong Pu<sup>a,c,d,\*</sup>

<sup>a</sup>CAS Center for Excellence in Nanoscience, Beijing Key Laboratory of Micro-nano Energy and Sensor, Beijing Institute of Nanoenergy and Nanosystems, Chinese Academy of Sciences, Beijing 101400, P. R. China.

<sup>b</sup>Department of Applied Biology and Chemical Technology, The Hong Kong Polytechnic University, Hung Hom, Kowloon, Hong Kong SAR, China.

<sup>c</sup>Center on Nanoenergy Research, School of Physical Science and Technology, Guangxi University, Nanning 530004, P. R. China.

<sup>d</sup>School of Nanoscience and Technology, University of Chinese Academy of Sciences, Beijing 100049, P. R. China.

<sup>#</sup>These authors contributed equally.

\* Corresponding author.

E-mail: [puxiong@binn.cas.cn](mailto:puxiong@binn.cas.cn); [bhuang@polyu.edu.hk](mailto:bhuang@polyu.edu.hk) (BH)

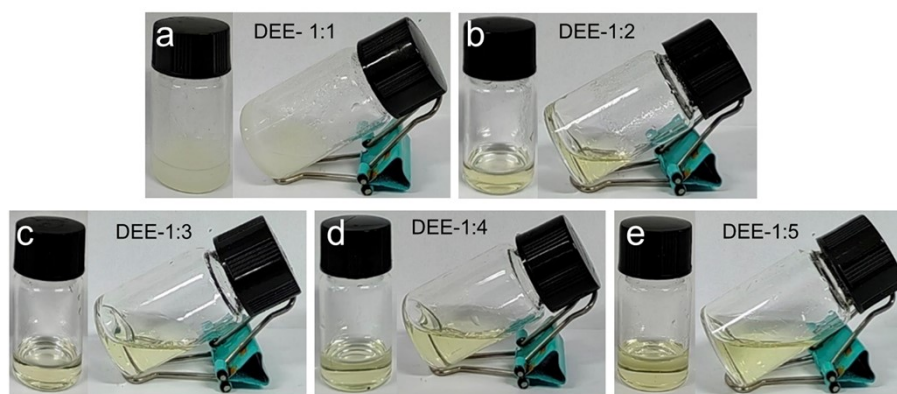

**Fig. S1** DEEs formed by CTFP and LiTFSI at various molar ratios.

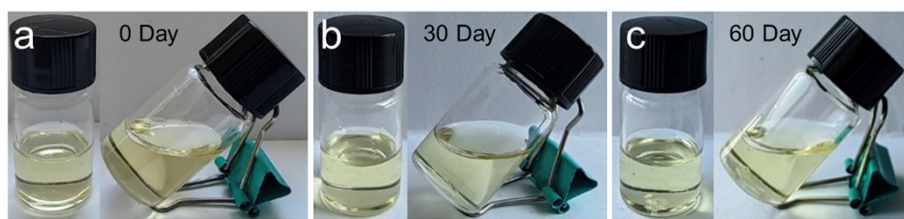

**Fig. S2** Optical diagram of stability of DEE-1:4 solutions at room temperature.

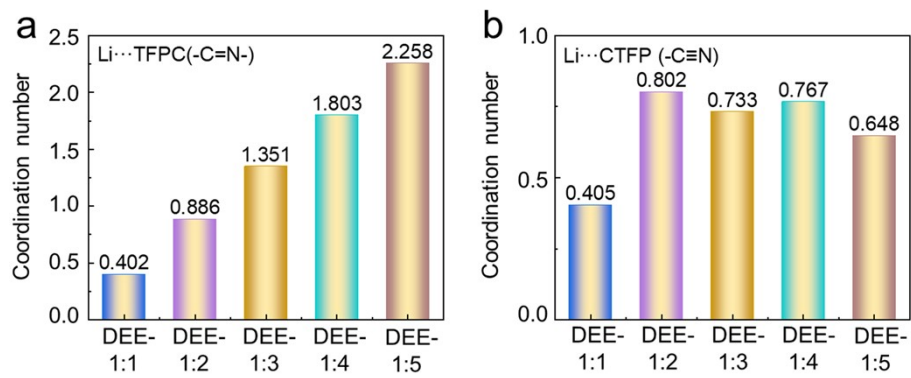

**Fig. S3** Calculation of coordination number of DEEs at various molar ratios.

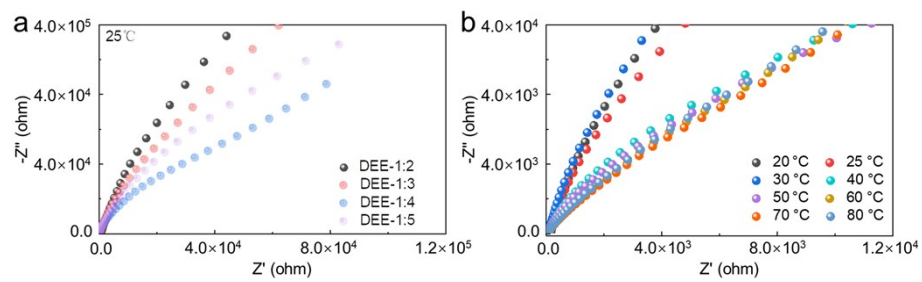

**Fig. S4** (a) Impedance diagram of DEEs at various molar ratios at 25 °C. (b) Impedance diagram of the DEE-1:4 at 20 °C to 80 °C.

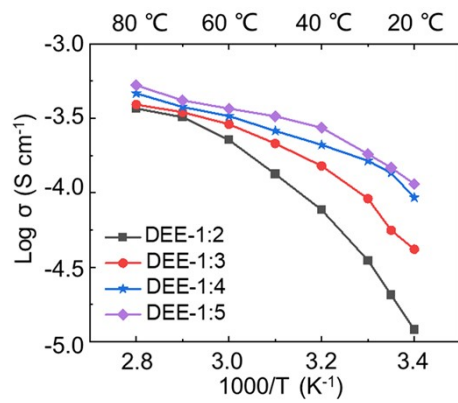

**Fig. S5** Temperature dependence of ionic conductivity of DEEs at various molar ratios.

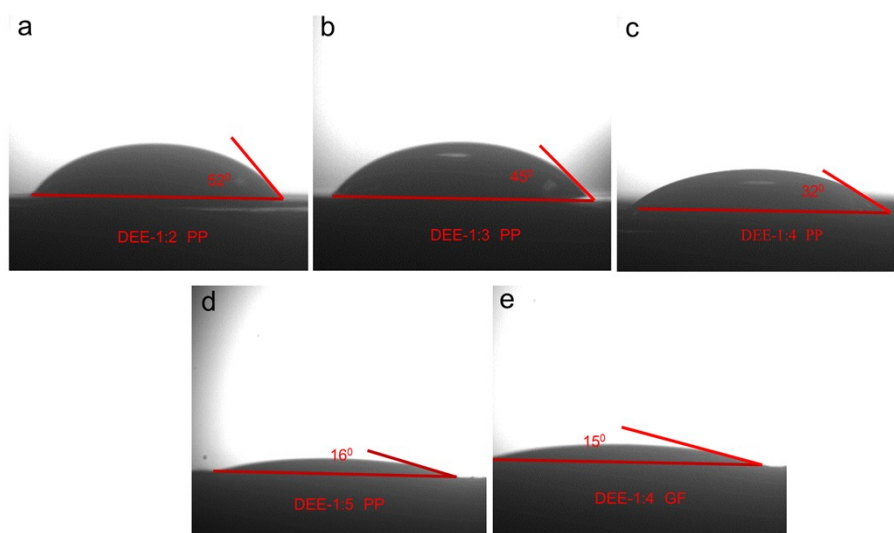

**Fig. S6** (a-e) Contact angle test of DEEs at various molar ratios.

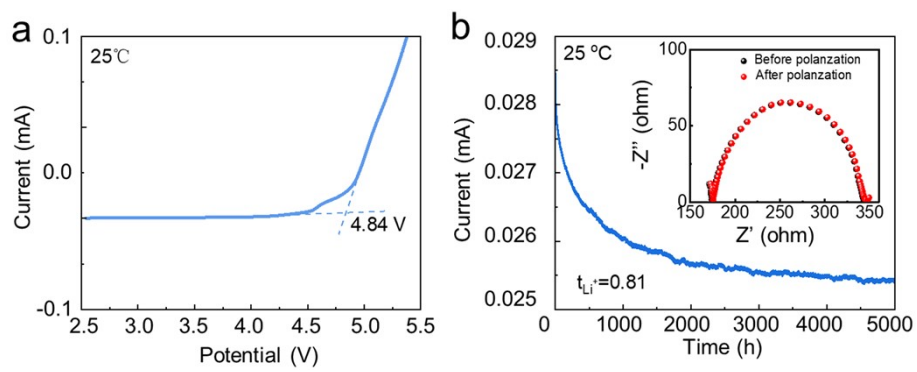

**Fig. S7** (a) Electrochemical windows, and (b)  $\text{Li}^+$  transference number of the DEE-1:4 at 25 °C.



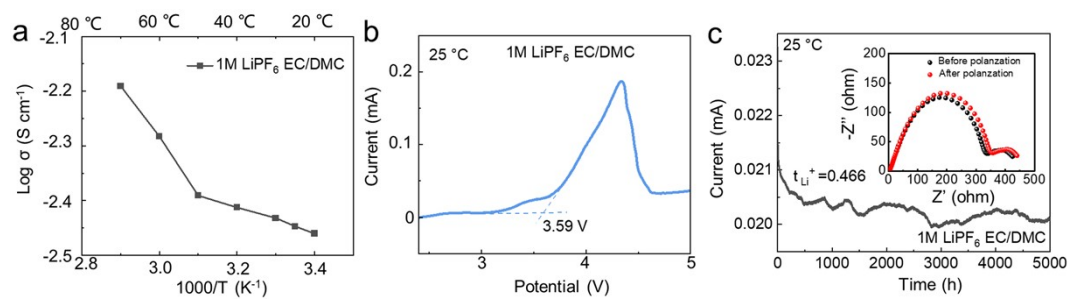

**Fig. S8** (a) Temperature dependence of ionic conductivity of 1M LiPF<sub>6</sub> EC/DMC at various molar ratios. (b) Electrochemical windows, and (c) Li<sup>+</sup> transference number of the 1M LiPF<sub>6</sub> EC/DMC at 25 °C.

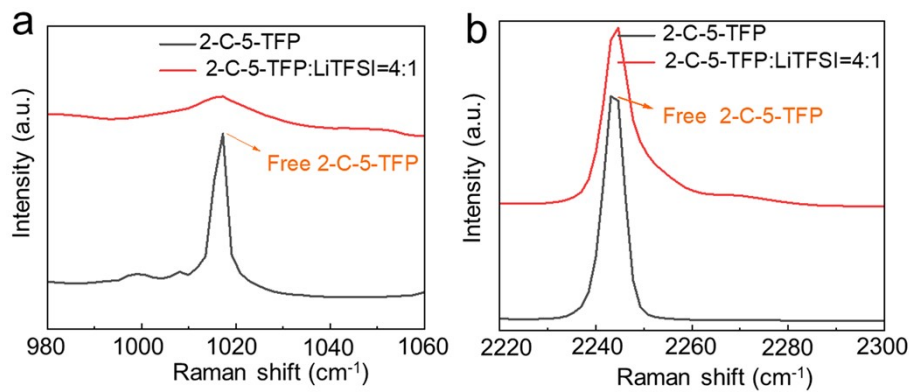

**Fig. S9** (a-b) Raman spectra of pyridine-N and cyanide-N group of 2-C-5-TFP and corresponding DEEs.

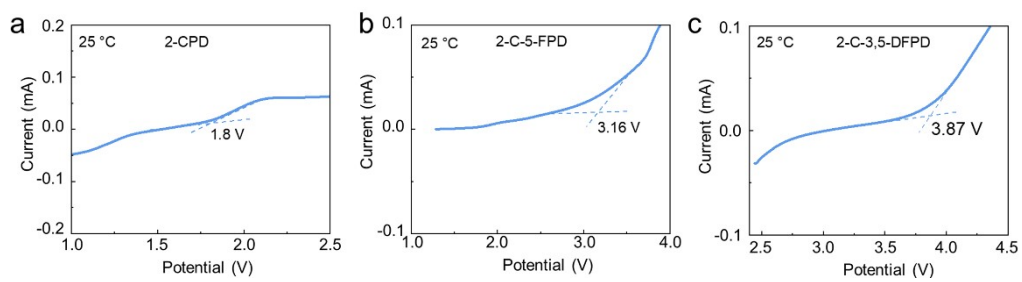

**Fig. S10** (a-c) Electrochemical windows of the 2-CP, 2-C-5-FP, 2-C-3,5-DFP at 25 °C, respectively.

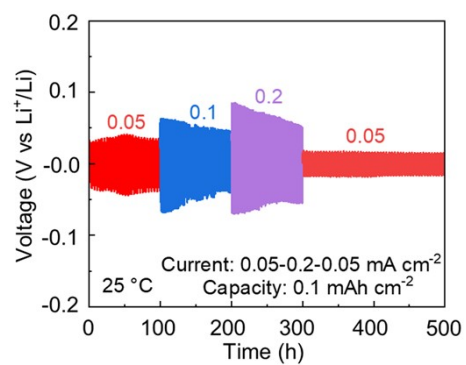

**Fig. S11** Voltage profiles of the Li//1M LiPF<sub>6</sub> EC/DMC//Li cells at various current densities.

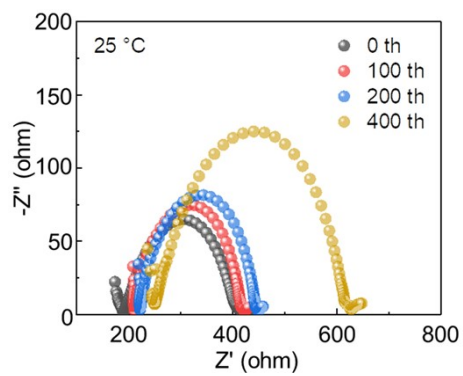

**Fig. S12** EIS profiles of Li//DEE-1:4//Li cell at different cycles under a constant current density of 0.1 mA cm<sup>-2</sup>.

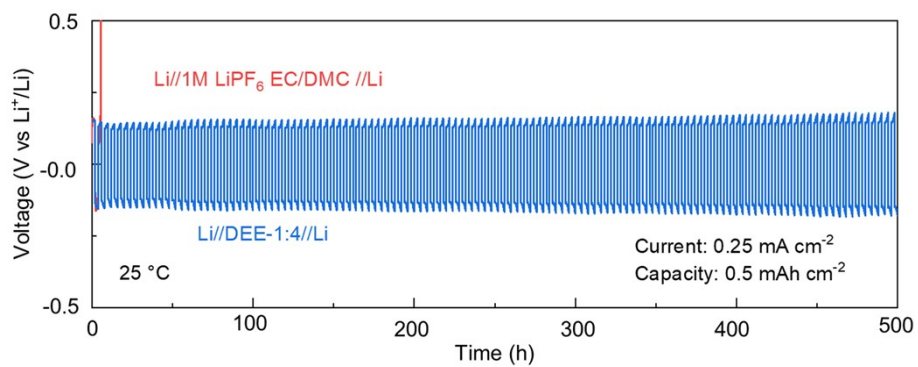

**Fig. S13** Voltage profiles of the Li//DEE-1:4//Li cells and Li//1M LiPF<sub>6</sub> EC/DMC//Li cells with area capacity of 0.5 mAh cm<sup>-2</sup>.

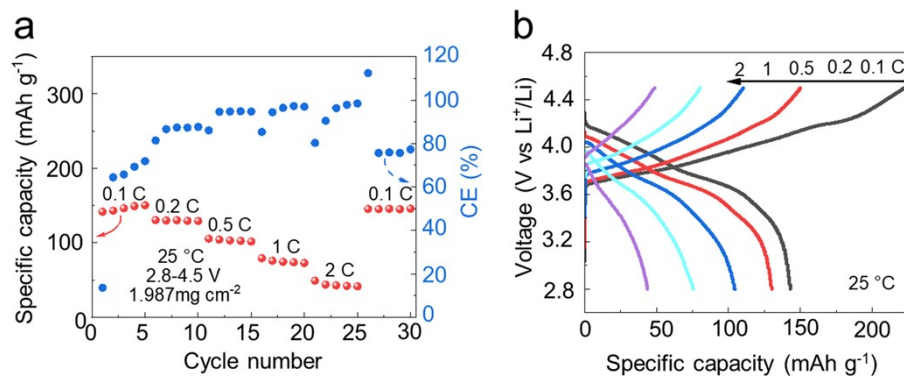

**Fig. S14** (a) Rate performances and (b) Charge-discharge curves of Li//1M LiPF<sub>6</sub> EC/DMC//NCM811 cells at different C rates.

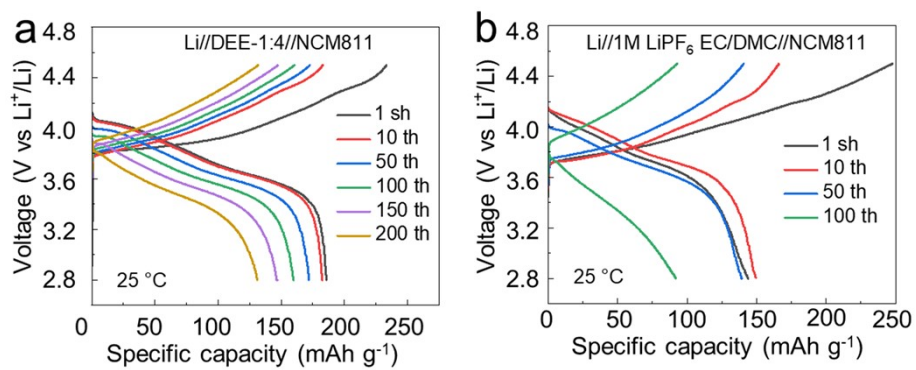

**Fig. S15** (a-b) Charge-discharge curves of Li//DEE-1:4//NCM811 cells and Li//1M LiPF<sub>6</sub> EC/DMC//NCM811 cells with different number of cycles at 0.5 C.



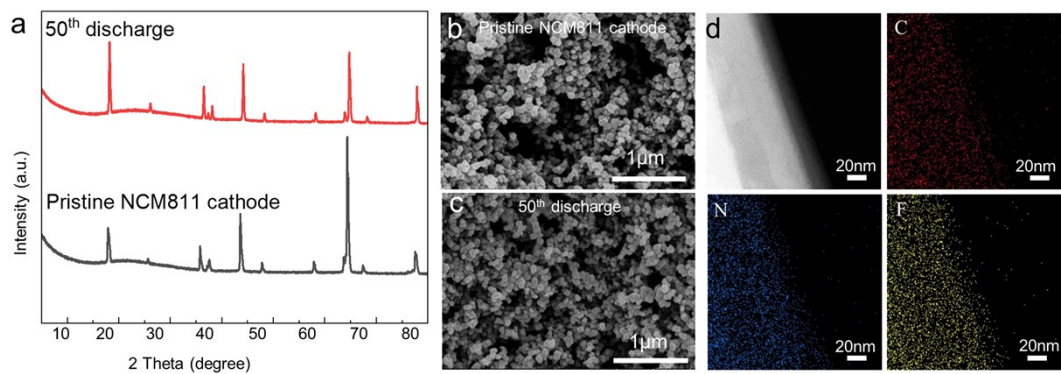

**Fig. S16** (a-c) XRD curves and SEM images of NCM811 cathode before and after 50 cycles. (d) Element mapping distribution of CEI layer of NCM811 cathode after 50 cycles.

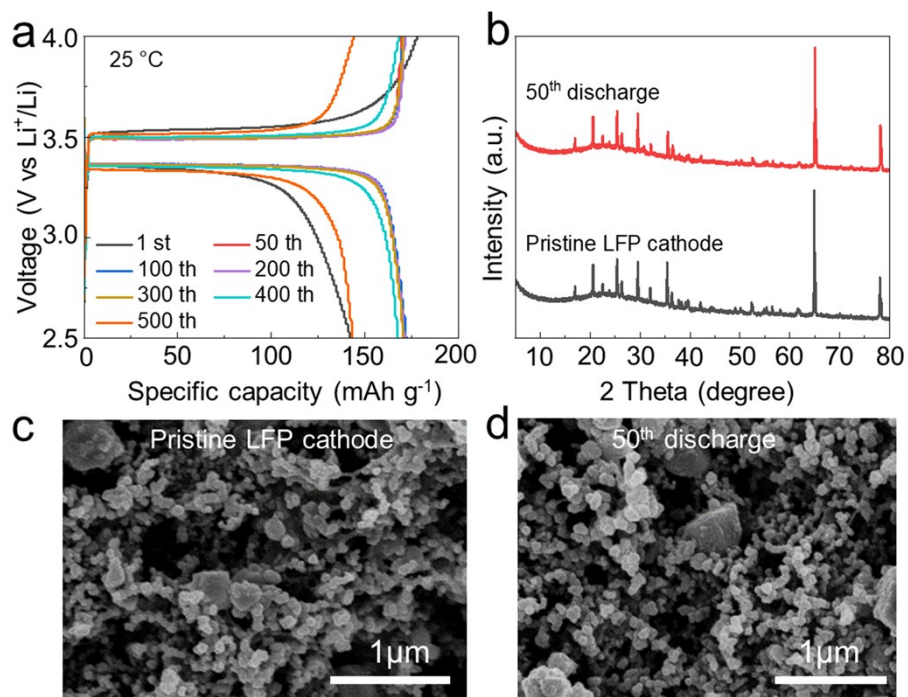

**Fig. S17** (a) Charge-discharge curves of Li//DEE-1:4//LFP cell with different number of cycles at 0.5 C. (b-d) XRD curves and SEM images of LFP cathode before and after 50 cycles.

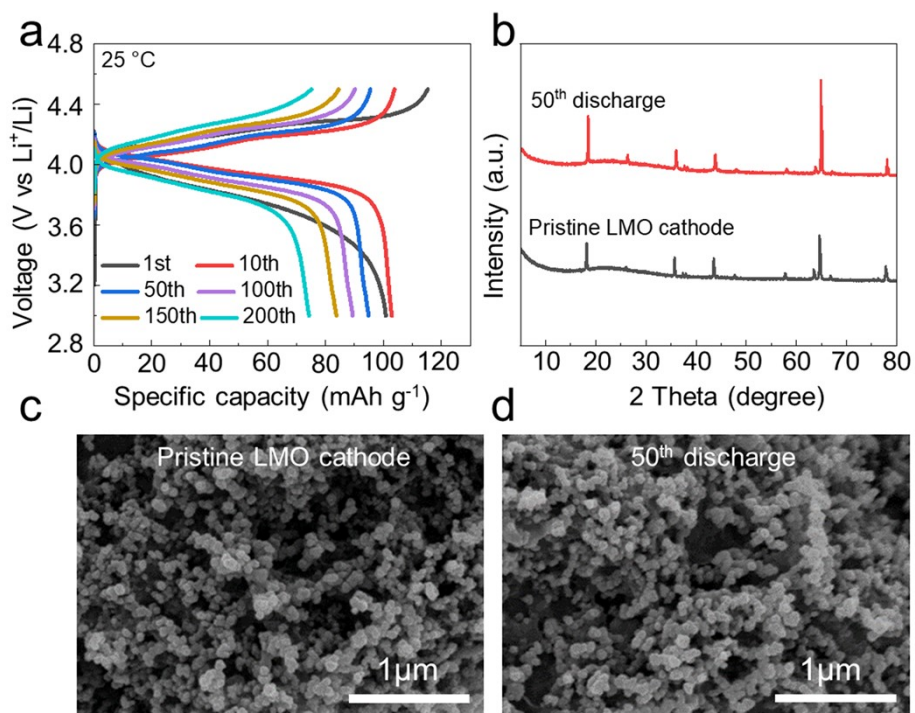

**Fig. S18** (a) Charge-discharge curves of Li//DEE-1:4//LMO cell with different number of cycles at 0.5 C. (b-d) XRD curves and SEM images of LMO cathode before and after 50 cycles.

**Table S1.** Comparison of the Various performance of DEEs with other reported polymer electrolytes.

| Electrolytes            | Liquid /Gel | Cathode material                 | Operating voltage | Specific capacity (mAh g <sup>-1</sup> ) | Cell cycle | Capacity retention ratio     | Ref.      |
|-------------------------|-------------|----------------------------------|-------------------|------------------------------------------|------------|------------------------------|-----------|
| DpyDS                   | Liquid      | LiFePO <sub>4</sub>              | 3-3.5 V           | 130(0.1C)                                | 5          | 100%(0.1C)                   | 1         |
| PVDF/DMIIm              | Gel         | LiFePO <sub>4</sub>              | 2.5-4 V           | 158(0.1C)                                | 800        | 80%(2C)                      | 2         |
| SN/LiDFOB               | Liquid      | LiCoO <sub>2</sub>               | 3-4.7 V           | 228(0.1C)                                | 500        | 70%(1C)                      | 3         |
| TXE/SN                  | Liquid      | LiCoO <sub>2</sub>               | 3-4.3 V           | 152.9(0.5C)                              | 200        | 90%(0.3C)                    | 4         |
| UPyMA-PETEA             | Gel         | LiMn <sub>2</sub> O <sub>4</sub> | 3-4.4 V           | 117.2(0.1C)                              | 200        | 86.1%(0.1C)                  | 5         |
| Urea                    | Liquid      | LiFePO <sub>4</sub>              | 2-3.8 V           | 161(0.1C)                                | 1000       | 92.1%(1C)                    | 6         |
| PEO/DMMSA               | Gel         | LiFePO <sub>4</sub>              | 2-3.8 V           | 168(0.2C)                                | 30         | 100%(0.2C)                   | 7         |
| ETG                     | Gel         | LiFePO <sub>4</sub>              | 2.5-4.2V          | 158.8(0.1C)                              | 100        | 81.4%(0.1C)                  | 8         |
| X-PPS-D4                | Gel         | LiFePO <sub>4</sub>              | 2.5-3.8V          | 154(0.1C)                                | 1000       | 86%(1C)                      | 9         |
| Urea/FEC                | Liquid      | LiFePO <sub>4</sub>              | 2-3.8 V           | 140.7(50mA g <sup>-1</sup> )             | 200        | 94.3%(50mA g <sup>-1</sup> ) | 10        |
| LiNO <sub>3</sub> /NMAC | Liquid      | NCM622                           | 3-4.3 V           | 168(0.1C)                                | 600        | 84%(0.5C)                    | 11        |
| PDOL                    | Gel         | LiFePO <sub>4</sub>              | 2.5-4V            | 139.6(0.1C)                              | 200        | 90%(0.2C)                    | 12        |
| ASPE                    | Gel         | LiCoO <sub>2</sub>               | 3-4.6V            | 192.7(0.1C)                              | 1000       | 84%(0.5C)                    | 13        |
| TFA/EC/FEC              | Liquid      | LiFePO <sub>4</sub>              | 2.4-4.1V          | 148(0.1C)                                | 70         | 67.6%(0.1C)                  | 14        |
| CNCE/SN                 | Gel         | LiCoO <sub>2</sub>               | 3-4.45V           | 162                                      | 200        | 85%(0.1C)                    | 15        |
| PEGMEA/SN               | Gel         | LiFePO <sub>4</sub>              | 2.5-4.2V          | 163(0.1C)                                | 1500       | 80.3%(0.5C)                  | 16        |
| SSH-PEPEA               | Gel         | LiFePO <sub>4</sub>              | 2.5-4.2V          | 131.7(0.1C)                              | 100        | 86.1%(0.1C)                  | 17        |
| LBS                     | Liquid      | LiFePO <sub>4</sub>              | 2.5-4.2V          | 122(3C)                                  | 500        | 90(2C)                       | 18        |
| CPE5                    | Gel         | LiFePO <sub>4</sub>              | 2.5-3.8V          | 155(0.2C)                                | 400        | 95.3%(0.2C)                  | 19        |
| PDMS-SN                 | Liquid      | NCM622                           | 3-4.2V            | 167(100mA g <sup>-1</sup> )              | 100        | 87%(100mA g <sup>-1</sup> )  | 20        |
| CTFP                    | Liquid      | NCM811                           | 2.8-4.5V          | 205.5(0.1C)                              | 200        | 70.6%(0.5C)                  | This work |

## References

- 1 J. H. Song, Y. B. Si, W. Guo, D. H. Wang and Y. Z. Fu, *Angew. Chem.-Int. Edit.*, 2021, **60**, 9881-9885.
- 2 X. P. Pei, Y. J. Li, T. Ou, X. C. Liang, Y. Yang, E. N. Jia, Y. Tan and S. J. Guo, *Angew. Chem.-Int. Edit.*, 2022, **61**, e202205075.
- 3 Z. L. Hu, F. Xian, Z. Y. Guo, C. L. Lu, X. F. Du, X. Y. Cheng, S. Zhang, S. M. Dong, G. L. Cui and L. Q. Chen, *Chem. Mat.*, 2020, **32**, 3405-3413.
- 4 J. N. Zhang, H. Wu, X. F. Du, H. Zhang, L. Huang, F. Sun, T. T. Liu, S. W. Tian, L. X. Zhou, S. J. Hu, Z. X. Yuan, B. T. Zhang, J. J. Zhang and G. L. Cui, *Adv. Energy Mater.*, 2023, **13**, 2202529.
- 5 P. Jaumaux, Q. Liu, D. Zhou, X. F. Xu, T. Y. Wang, Y. Z. Wang, F. Y. Kang, B. H. Li and G. X. Wang, *Angew. Chem.-Int. Edit.*, 2020, **59**, 9134-9142.
- 6 W. T. Li, W. Liu, B. D. Huang, Z. W. Cai, H. Zhong, F. Guo and Y. H. Mai, *J. Mater. Chem. A*, 2022, **10**, 15449-15459.
- 7 P. P. Dong, X. H. Zhang, K. S. Han, Y. H. Cha and M. K. Song, *J. Energy Chem.*, 2022, **70**, 363-372.
- 8 Z. X. Li, S. Z. Zhang, Z. Jiang, D. Cai, C. D. Gu and J. P. Tu, *Mater. Chem. Phys.*, 2021, **267**, 124701.
- 9 Y. X. Jiang, Y. D. Song, X. Chen, H. J. Wang, L. J. Deng and G. Yang, *Energy Storage Mater.*, 2022, **52**, 514-523.
- 10 W. T. Li, W. Liu, Z. W. Cai, B. D. Huang, H. Zhong and Y. H. Mai, *J. Energy Storage*, 2023, **68**, 107766.
- 11 Y. H. Liang, W. B. Wu, D. P. Li, H. Wu, C. C. Gao, Z. J. Chen, L. J. Ci and J. H. Zhang, *Adv. Energy Mater.*, 2022, **12**, 2202493.
- 12 Y. Q. Wang, R. Xu, B. W. Xiao, D. Lv, Y. Peng, Y. Zheng, Y. H. Shen, J. C. Chai, X. H. Lei, S. Y. Luo, X. Y. Wang, X. M. Liang, J. W. Feng and Z. H. Liu, *Mater. Today Phys.*, 2022, **22**, 100620.
- 13 H. C. Wang, J. Song, K. Zhang, Q. Fang, Y. X. Zuo, T. H. Yang, Y. L. Yang, C. Gao, X. F. Wang, Q. Q. Pang and D. G. Xia, *Energy Environ. Sci.*, 2022, **15**, 5149-

5158.

- 14 L. Mezzomo, N. Pianta, I. Ostroman, N. Aloni, D. Golodnitsky, E. Peled, P. Mustarelli and R. Ruffo, *J. Power Sources*, 2023, **561**, 232746.
- 15 H. Zhang, L. X. Zhou, X. F. Du, J. J. Zhang, S. W. Tian, T. T. Liu, J. N. Zhang, S. J. Hu, W. L. Song, X. H. Zhou and G. L. Cui, *Carbon Energy*, 2022, **4**, 1093-1106.
- 16 D. C. Zhang, Y. X. Liu, Z. Y. Sun, Z. B. Liu, X. J. Xu, L. Xi, S. M. Ji, M. Zhu and J. Liu, *Angew. Chem.-Int. Edit.*, 2023, **11**, e202310006.
- 17 Q. Q. Li, Z. J. Zhang, Y. Li, H. Li, Z. Y. Liu, X. J. Liu and Q. Xu, *ACS Appl. Mater. Interfaces*, 2022, **14**, 49700-49708.
- 18 W. B. Wu, Y. H. Liang, D. P. Li, Y. Y. Bo, D. Wu, L. J. Ci, M. Y. Li and J. H. Zhang, *ACS Nano*, 2022, **16**, 14558-14568.
- 19 Y. C. Huang, Y. L. Chu, C. C. Chang, L. Y. Liu, H. S. Teng, B. H. Chen and J. S. Jan, *J. Electroanal. Chem.*, 2023, **940**, 117455.
- 20 W. P. Li, P. Wen, Y. Ren, W. Xie, J. Lin, M. Chen, Y. Yang and X. R. Lin, *ACS Energy Lett.*, 2023, **8**, 5128-5135.
